# Supplementary material for: Psychometric Properties and Standardization of the Shortened Latvian Personality Inventory (LPI-v3s) in Athlete Sample: Implications for Evidence-Based Assessment
Source: Research Square preprint supplement (doi:10.21203/rs.3.rs-7957250/v1), 2025-11-26
Supplement: Supplementary file 1 [file 7238bdd526c4d116999c6820.xlsx]

## Sheet: Norm_tables
Anxious-Insecurity (N1): Male				Anxious-Insecurity (N1): Female (15-20)				Anxious-Insecurity (N1): Female (21-45)				Irritability (N2): Male				Irritability (N2): Female				Sociability (E1): Total				Cheerfulness (E2): Total				Sensation-Seeking (E3): Total				Orderliness (C1): Male				Orderliness (C1): Female (15-20)				Orderliness (C1): Female (21-45)				Self-discipline (C2): Total				Prudence (C4): Male (15-20)
Norm score table				Norm score table				Norm score table				Norm score table				Norm score table				Norm score table				Norm score table				Norm score table				Norm score table				Norm score table				Norm score table				Norm score table				Norm score table
Raw	Norm	Percentile		Raw	Norm	Percentile		Raw	Norm	Percentile		Raw	Norm	Percentile		Raw	Norm	Percentile		Raw	Norm	Percentile		Raw	Norm	Percentile		Raw	Norm	Percentile		Raw	Norm	Percentile		Raw	Norm	Percentile		Raw	Norm	Percentile		Raw	Norm	Percentile		Raw	Norm
10	24.3	0.5		10	20	0.1		"10-12"	24.5	0.5		10	31.8	3.4		10	27.4	1.2		10	26.4	0.9		10	20	0.1		10	22.8	0.3		10	20	0.1		12.5	23	0.3		15	25.1	0.6		10	21.9	0.2		"10-11"	21.5
11	27.1	1.1		11	20.3	0.2		13	28.4	1.5		11	33	4.4		11	28.8	1.7		11	27.8	1.3		11	20.2	0.1		11	24	0.5		"11-12"	20	0.1		13.5	24.3	0.5		16	26.9	1		11	23.9	0.4		12	25.7
12	29.5	2		12	23.1	0.4		14	31.8	3.5		12	34.2	5.7		12	30.2	2.4		12	29.1	1.8		12	21.1	0.2		12	25.2	0.7		13	22.3	0.3		14.5	25.6	0.7		17	28.4	1.5		12	25.6	0.7		13	27.8
13	31.6	3.3		13	25.5	0.7		15	34.1	5.7		13	35.4	7.2		13	31.5	3.2		13	30.5	2.5		13	21.9	0.3		13	26.3	0.9		14	24.9	0.6		15.5	26.9	1		18	29.8	2.2		13	27.1	1.1		14	29.5
14	33.5	5		14	27.6	1.3		16	36.1	8.2		14	36.6	9		14	32.9	4.3		14	31.8	3.4		14	22.9	0.3		14	27.4	1.2		15	26.9	1.1		16.5	28.3	1.5		19	31.1	2.9		14	28.6	1.6		15	31
15	35.4	7.2		15	29.6	2.1		17	37.8	11		15	37.9	11.2		15	34.2	5.7		15	33.1	4.5		15	23.8	0.4		15	28.6	1.6		16	28.7	1.7		17.5	29.7	2.1		20	32.4	3.9		15	29.9	2.3		16	32.4
16	37.1	9.9		16	31.4	3.1		18	39.3	14.2		16	39.1	13.8		16	35.5	7.3		16	34.4	5.9		16	24.7	0.6		16	29.7	2.1		17	30.3	2.4		18.5	31.2	3		21	33.6	5		16	31.3	3.1		17	33.6
17	38.8	13.1		17	33.1	4.5		19	40.7	17.7		17	40.4	16.7		17	36.7	9.2		17	35.6	7.5		17	25.7	0.8		17	30.7	2.7		18	31.7	3.4		19.5	32.6	4.1		22	34.8	6.4		17	32.5	4		18	34.9
18	40.4	16.9		18	34.7	6.3		20	42.1	21.4		18	41.6	20		18	37.9	11.3		18	36.9	9.5		18	26.7	1		18	31.8	3.5		19	33.1	4.6		20.5	34.1	5.6		23	35.9	7.9		18	33.8	5.2		19	36
19	42	21.2		19	36.3	8.5		21	43.4	25.4		19	42.8	23.6		19	39.1	13.8		19	38.1	11.7		19	27.8	1.3		19	32.9	4.4		20	34.4	5.9		21.5	35.5	7.4		24	37	9.7		19	35	6.7		20	37.2
20	43.6	26		20	37.8	11		22	44.6	29.6		20	44	27.5		20	40.2	16.4		20	39.3	14.2		20	28.8	1.7		20	34	5.4		21	35.6	7.6		22.5	37	9.6		25	38.1	11.7		20	36.2	8.3		21	38.3
21	45.1	31.2		21	39.2	14		23	45.9	34		21	45.2	31.6		21	41.4	19.4		21	40.5	17.1		21	29.9	2.2		21	35	6.7		22	36.8	9.4		23.5	38.4	12.2		26	39.2	14		21	37.3	10.3		22	39.5
22	46.6	36.8		22	40.6	17.3		24	47.1	38.6		22	46.4	35.8		22	42.5	22.5		22	41.7	20.2		22	30.9	2.8		22	36	8.2		23	38	11.5		24.5	39.7	15.2		27	40.3	16.5		22	38.5	12.5		23	40.6
23	48.1	42.6		23	41.9	21		25	48.3	43.2		23	47.5	40.2		23	43.5	25.8		23	42.8	23.6		23	32	3.6		23	37.1	9.9		24	39.1	13.9		25.5	41.1	18.6		28	41.3	19.2		23	39.6	14.9		24	41.7
24	49.6	48.4		24	43.3	25.1		26	49.5	47.9		24	48.6	44.5		24	44.5	29.3		24	44	27.3		24	33.1	4.6		24	38.1	11.8		25	40.3	16.5		26.5	42.4	22.3		29	42.4	22.2		24	40.7	17.7		25	42.8
25	51.1	54.3		25	44.6	29.4		27	50.7	52.7		25	49.7	48.8		25	45.6	32.9		25	45.1	31.1		25	34.3	5.8		25	39.2	14		26	41.4	19.4		27.5	43.6	26.3		30	43.4	25.4		25	41.9	20.8		26	43.9
26	52.5	60		26	45.9	34		28	51.9	57.5		26	50.8	53		26	46.6	36.5		26	46.2	35.1		26	35.4	7.2		26	40.2	16.4		27	42.4	22.5		28.5	44.9	30.5		31	44.4	28.9		26	43	24.1		27	45.1
27	54	65.5		27	47.1	38.7		29	53.1	62.1		27	51.8	57.1		27	47.5	40.3		27	47.3	39.2		27	36.5	8.9		27	41.3	19.2		28	43.5	25.8		29.5	46.1	34.9		32	45.5	32.5		27	44.1	27.7		28	46.2
28	55.4	70.7		28	48.4	43.6		30	54.3	66.7		28	52.8	61		28	48.5	44		28	48.3	43.4		28	37.7	11		28	42.3	22.1		29	44.6	29.4		30.5	47.3	39.4		33	46.5	36.3		28	45.2	31.6		29	47.4
29	56.9	75.4		29	49.6	48.6		31	55.6	71.2		29	53.8	64.7		29	49.4	47.8		29	49.4	47.6		29	38.9	13.3		29	43.4	25.4		30	45.6	33.1		31.5	48.5	43.9		34	47.5	40.3		29	46.3	35.6		30	48.6
30	58.3	79.7		30	50.9	53.5		32	56.9	75.5		30	54.7	68.2		30	50.4	51.5		30	50.4	51.7		30	40	16		30	44.4	28.9		31	46.7	37.1		32.5	49.6	48.5		35	48.6	44.4		30	47.4	39.9		31	49.8
31	59.7	83.4		31	52.1	58.4		33	58.2	79.5		31	55.7	71.5		31	51.3	55.2		31	51.5	55.8		31	41.2	19		31	45.5	32.6		32	47.8	41.1		33.5	50.8	53.1		36	49.6	48.5		31	48.5	44.3		32	51.1
32	61.1	86.7		32	53.4	63.2		34	59.7	83.3		32	56.6	74.6		32	52.2	58.8		32	52.5	59.8		32	42.4	22.4		32	46.6	36.6		33	48.8	45.3		34.5	51.9	57.6		37	50.7	52.8		32	49.7	48.7		33	52.4
33	62.5	89.5		33	54.6	67.7		35	61.2	86.8		33	57.5	77.4		33	53.1	62.3		33	53.5	63.7		33	43.6	26.1		33	47.6	40.7		34	49.9	49.6		35.5	53	61.9		38	51.8	57		33	50.8	53.2		34	53.6
34	63.9	91.8		34	55.9	72.1		36	62.8	89.9		34	58.4	80		34	54	65.7		34	54.5	67.3		34	44.8	30.1		34	48.7	44.9		35	51	53.9		36.5	54.2	66.1		39	52.9	61.2		34	51.9	57.7		35	55
35	65.3	93.6		35	57.1	76.1		37	64.5	92.7		35	59.3	82.5		35	54.9	68.9		35	55.5	70.8		35	46	34.4		35	49.8	49.3		36	52.1	58.2		37.5	55.3	70.1		40	54	65.4		35	53.1	62.1		36	56.3
36	66.6	95.2		36	58.4	79.9		38	66.5	95.1		36	60.2	84.6		36	55.8	72		36	56.5	74.1		36	47.2	38.9		36	50.9	53.7		37	53.2	62.4		38.5	56.4	73.9		41	55.1	69.5		36	54.2	66.4		37	57.7
37	67.9	96.3		37	59.7	83.3		39	68.9	97.1		37	61.1	86.6		37	56.8	75		37	57.5	77.2		37	48.4	43.6		37	52.1	58.2		38	54.3	66.6		39.5	57.5	77.5		42	56.2	73.4		37	55.4	70.5		38	59.1
38	69.2	97.3		38	61	86.4		40	71.9	98.6		38	62	88.4		38	57.6	77.8		38	58.4	80		38	49.6	48.4		38	53.2	62.6		39	55.4	70.7		40.5	58.7	80.8		43	57.4	77.1		38	56.5	74.4		39	60.5
39	70.5	98		39	62.4	89.2		41	76.6	99.6		39	62.9	90.1		39	58.6	80.4		39	59.4	82.6		39	50.8	53.3		39	54.4	66.9		40	56.6	74.6		41.5	59.9	83.8		44	58.6	80.6		39	57.7	78		40	61.9
40	71.8	98.5		40	63.8	91.5		42	80	99.9		40	63.7	91.5		40	59.5	82.9		40	60.4	85		40	52.1	58.2		40	55.6	71.1		41	57.8	78.3		42.5	61.1	86.6		45	59.9	83.8		40	58.9	81.3		41	63.3
41	73	98.9		41	65.2	93.6		43 - 48	80	99.9		41	64.6	92.8		41	60.4	85.2		41	61.3	87.2		41	53.3	63.1		41	56.8	75.1		42	59	81.7		43.5	62.4	89.2		46	61.2	86.8		41	60.1	84.3		42	64.7
42	74.2	99.2		42	66.7	95.3		49	80	99.9		42	65.5	94		42	61.4	87.3		42	62.3	89.1		42	54.6	67.8		42	58	78.9		43	60.3	84.9		44.5	63.7	91.4		47	62.5	89.5		42	61.3	87		43	66
43	75.4	99.4		43	68.3	96.6		50	80	99.9		43	66.5	95		43	62.4	89.2		43	63.3	90.8		43	55.9	72.4		43	59.3	82.4		44	61.7	87.9		45.5	65.1	93.4		48	64	91.8		43	62.5	89.4		44	67.3
44	76.6	99.6		44	70	97.7		Note. The range of raw scores was manually set from 10 to 50.				44	67.4	95.9		44	63.4	90.9		44	64.3	92.4		44	57.3	76.7		44	60.7	85.7		45	63.1	90.5		46.5	66.7	95.2		49	65.5	93.9		44	63.7	91.4		45	68.5
45	77.7	99.7		45	71.9	98.6						45	68.4	96.7		45	64.4	92.5		45	65.3	93.7		45	58.7	80.7		45	62.1	88.6		46	64.6	92.7		47.5	68.5	96.8		50	67	95.6		45	64.9	93.2		46	69.7
46	78.8	99.8		46	74.1	99.2						46	69.5	97.4		46	65.5	94		46	66.3	94.9		46	60.1	84.4		46	63.5	91.2		47	66.2	94.7		48.5	71	98.2		Note. The range of raw scores was automatically retrieved from the dataset.				46	66.1	94.6		47	70.8
47	79.9	99.9		47	76.8	99.6						47	70.6	98		47	66.7	95.2		47	67.4	95.9		47	61.6	87.8		47	65.1	93.5		48	67.9	96.3		49.5	74.4	99.3						47	67.3	95.8		48	71.9
48 - 50	80	99.9		48	80	99.9						48	71.8	98.5		48	67.9	96.4		48	68.4	96.7		48	63.3	90.8		48	66.9	95.4		49	69.8	97.6		Note. The range of raw scores was automatically retrieved from the dataset.								48	68.5	96.8		49	72.9
Note. The range of raw scores was manually set from 10 to 50.				49 - 50	80	99.9						49	73.3	99		49	69.3	97.3		49	69.6	97.5		49	65	93.4		49	68.8	97		50	72	98.6										49	69.7	97.6		50	73.8
				Note. The range of raw scores was manually set from 10 to 50.								50	75.4	99.4		50	71	98.2		50	70.7	98.1		50	67.1	95.6		50	71.1	98.3		Note. The range of raw scores was manually set from 10 to 50.												50	70.9	98.2		Note. The range of raw scores was manually set from 10 to 50.
												Note. The range of raw scores was manually set from 10 to 50.				Note. The range of raw scores was manually set from 10 to 50.				Note. The range of raw scores was manually set from 10 to 50.				Note. The range of raw scores was manually set from 10 to 50.				Note. The range of raw scores was manually set from 10 to 50.																Note. The range of raw scores was manually set from 10 to 50.
[truncated: 88 more columns]

## Sheet: Descriptive_stat
	Descriptives (Normative Sample Devided by Gender and Age)											Descriptives (Normative Sample Devided by Gender)										Descriptives (Total Normative Sample, N = 436)
	Scale	Gender	Age Group	N	Mean	Median	SD	Minimum	Maximum			Scale	Gender	N	Mean	Median	SD	Minimum	Maximum			Scale	N	Mean	Median	SD	Minimum	Maximum
	N1_NEW	Male	15-20	128	24.5	23.3	6.73	12.2	44.4			N1_NEW	Male	234	24.5	24.4	6.64	10	44.4			N1_NEW	436	26.3	25.6	7.26	10	46.7
			21-45	106	24.5	24.4	6.58	10	38.9				Female	202	28.3	27.8	7.44	12.2	46.7			N2_New	436	27.9	27.5	9.68	10	50
		Female	15-20	128	29.4	29.4	7.43	12.2	46.7			N2_New	Male	234	26	25	9.29	10	50			E1_NEW	436	30	30	9.14	10	50
			21-45	74	26.4	26.1	7.11	12.2	41.1				Female	202	30	30	9.7	10	50			E2_NEW	436	37.8	40	7.62	10	50
	N2_New	Male	15-20	128	26.2	25	9.03	10	50			E1_NEW	Male	234	29.6	30	8.99	10	50			E3_NEW	436	34.6	35	8.48	10	50
			21-45	106	25.8	25	9.63	10	45				Female	202	30.4	30	9.31	10	50			C1_NEW	436	33.9	35	8.32	12.5	50
		Female	15-20	128	31.4	30	9.52	10	50			E2_NEW	Male	234	38.1	40	7.51	10	50			C2_NEW	436	32.2	33.3	8.46	10	50
			21-45	74	27.6	25	9.61	10	50				Female	202	37.6	40	7.76	16.7	50			C4_NEW	436	32.1	33.3	7.99	10	50
	E1_NEW	Male	15-20	128	29.4	30	8.71	10	50			E3_NEW	Male	234	34.9	35	8.11	12.5	50			A2_NEW	436	32.8	32.5	8.4	10	50
			21-45	106	29.8	30	9.36	13.3	50				Female	202	34.3	35	8.91	10	50			A3_NEW	436	32.8	33.3	5.68	13.3	46.7
		Female	15-20	128	30.5	30	7.97	10	50			C1_NEW	Male	234	33.8	35	8.37	12.5	50			A4_NEW	436	32.1	32.5	9.68	10	50
			21-45	74	30.4	26.7	11.33	10	50				Female	202	34.1	35	8.27	12.5	50			O1_NEW	436	24.9	23.3	9.38	10	50
	E2_NEW	Male	15-20	128	37.6	38.3	8.06	10	50			C2_NEW	Male	234	33.2	33.3	7.62	13.3	50			O3_NEW	436	32.2	32.5	7.81	12.5	50
			21-45	106	38.6	40	6.79	16.7	50				Female	202	31	30	9.21	10	50			O4_NEW	436	32.5	33.3	8	10	50
		Female	15-20	128	37.8	40	7.99	16.7	50			C4_NEW	Male	234	32.4	33.3	8.3	13.3	50			H2_NEW	436	30.8	30	8.68	10	50
			21-45	74	37.2	36.7	7.38	23.3	50				Female	202	31.8	31.7	7.63	10	50			N_NEW	436	26.8	26.9	6.77	10	45.4
	E3_NEW	Male	15-20	128	35.8	37.5	7.94	15	50			A2_NEW	Male	234	32.6	32.5	8.42	10	50			E_NEW	436	33.9	33.3	6.88	10	50
			21-45	106	33.7	33.8	8.2	12.5	50				Female	202	33	32.5	8.4	12.5	50			C_NEW	436	32.9	33	6.37	16	49
		Female	15-20	128	34.8	35	8.77	10	50			A3_NEW	Male	234	32.5	33.3	6.13	13.3	46.7			A_NEW	436	32.4	32.7	6.53	11.8	50
			21-45	74	33.4	35	9.14	10	50				Female	202	33.1	33.3	5.11	20	46.7			O_NEW	436	30.1	30	6.07	12	47
	C1_NEW	Male	15-20	128	32.9	35	8.37	12.5	50			A4_NEW	Male	234	34	35	9.29	10	50			M_NEW	436	25.1	25	7.17	10	47.5
			21-45	106	34.8	35	8.3	17.5	50				Female	202	30	30	9.7	10	50
		Female	15-20	128	33	32.5	7.89	12.5	50			O1_NEW	Male	234	23.2	23.3	8.69	10	46.7
			21-45	74	35.9	37.5	8.62	15	50				Female	202	26.8	26.7	9.78	10	50
	C2_NEW	Male	15-20	128	32.7	33.3	7.79	13.3	50			O3_NEW	Male	234	32.6	32.5	7.72	12.5	50
			21-45	106	33.9	33.3	7.39	16.7	50				Female	202	31.7	32.5	7.9	12.5	50
		Female	15-20	128	30.1	30	8.98	10	50			O4_NEW	Male	234	32.8	33.3	7.05	10	50
			21-45	74	32.6	33.3	9.45	10	50				Female	202	32.2	33.3	8.98	10	50
	C4_NEW	Male	15-20	128	30.8	30	7.88	13.3	50			H2_NEW	Male	234	30.1	30	8.95	10	50
			21-45	106	34.4	33.3	8.4	13.3	50				Female	202	31.6	30	8.3	10	50
		Female	15-20	128	31	30	7.08	13.3	50			N_NEW	Male	234	25	24.6	6.29	10	42.3
			21-45	74	33.3	33.3	8.34	10	50				Female	202	28.8	29.2	6.75	12.3	45.4
	A2_NEW	Male	15-20	128	33.2	32.5	7.95	12.5	50			E_NEW	Male	234	33.8	34.2	6.74	10	50
			21-45	106	31.8	32.5	8.94	10	50				Female	202	34	33.3	7.06	18.3	50
		Female	15-20	128	33.1	32.5	8.56	15	50			C_NEW	Male	234	33.2	33	6.5	16	49
			21-45	74	32.9	33.8	8.17	12.5	47.5				Female	202	32.5	32	6.2	18	49
	A3_NEW	Male	15-20	128	32.8	33.3	6.22	13.3	46.7			A_NEW	Male	234	32.9	33.6	6.41	15.5	50
			21-45	106	32	33.3	6.01	16.7	46.7				Female	202	31.9	32.7	6.64	11.8	45.5
		Female	15-20	128	33.3	33.3	5.49	20	46.7			O_NEW	Male	234	29.8	30	5.44	15	46
			21-45	74	32.7	33.3	4.37	23.3	43.3				Female	202	30.4	30.5	6.73	12	47
	A4_NEW	Male	15-20	128	33.8	35	9.03	10	50			M_NEW	Male	234	25	25	6.92	10	47.5
			21-45	106	34.2	35	9.63	15	50				Female	202	25.1	25	7.46	10	42.5
		Female	15-20	128	28.6	30	9.52	10	50
			21-45	74	32.4	35	9.61	10	50
	O1_NEW	Male	15-20	128	23.1	23.3	8.4	10	46.7
			21-45	106	23.3	23.3	9.06	10	46.7
		Female	15-20	128	26.7	26.7	9.85	10	50
			21-45	74	27.1	26.7	9.72	10	50
	O3_NEW	Male	15-20	128	31.4	32.5	7.23	12.5	50
			21-45	106	34	35	8.08	12.5	50
		Female	15-20	128	31.3	32.5	8.03	12.5	50
			21-45	74	32.3	32.5	7.68	12.5	50
	O4_NEW	Male	15-20	128	32.1	33.3	6.72	16.7	50
			21-45	106	33.5	33.3	7.4	10	50
		Female	15-20	128	31.7	33.3	8.63	10	50
			21-45	74	33	33.3	9.56	13.3	50
	H2_NEW	Male	15-20	128	27.9	26.7	7.9	10	46.7
			21-45	106	32.7	33.3	9.45	10	50
		Female	15-20	128	31.3	30	8	10	50
			21-45	74	32.3	33.3	8.81	13.3	50
	N_NEW	Male	15-20	128	25.1	24.2	6.25	12.3	42.3
			21-45	106	24.9	24.6	6.37	10	39.2
		Female	15-20	128	30	30	6.42	12.3	45.4
			21-45	74	26.8	27.7	6.84	13.8	41.5
	E_NEW	Male	15-20	128	33.5	34.2	7.16	10	48.3
			21-45	106	34.2	34.2	6.2	15	50
		Female	15-20	128	34.1	35	6.36	20	50
			21-45	74	33.8	33.3	8.18	18.3	50
	C_NEW	Male	15-20	128	32.2	32	6.58	16	49
			21-45	106	34.4	34	6.24	20	49
		Female	15-20	128	31.5	31	5.67	18	44
			21-45	74	34.1	34.5	6.75	18	49
	A_NEW	Male	15-20	128	33.5	33.6	6.1	15.5	46.4
			21-45	106	32.1	32.7	6.71	15.5	50
		Female	15-20	128	31.5	31.8	6.63	12.7	45.5
			21-45	74	32.7	33.6	6.64	11.8	43.6
	O_NEW	Male	15-20	128	29.1	29	5.19	18	40
			21-45	106	30.6	31	5.64	15	46
		Female	15-20	128	30	30	6.77	12	47
			21-45	74	31	31	6.65	17	46
	M_NEW	Male	15-20	128	24.6	25	6.92	10	42.5
			21-45	106	25.5	25	6.92	10	47.5
		Female	15-20	128	25.3	25	7.33	10	40
			21-45	74	24.8	25	7.73	10	42.5
