# Supplementary material for: Psychometric Properties and Standardization of the Shortened Latvian Personality Inventory (LPI-v3s) in Athlete Sample: Implications for Evidence-Based Assessment
Source: Research Square preprint supplement (doi:10.21203/rs.3.rs-7957250/v1), 2025-11-26
Supplement: Supplementary file 3 [file 9da8eff7f21535952c90e45e.docx]

**Appendix A. Supplementary Tables**

**Table S1.** Composition of the normative sample by stratum: Initial counts and final selection

| **Stratum**  *(gender, age, team vs individual sport)* | **Initial number of participants** | **Normative sample** | | |
| --- | --- | --- | --- | --- |
| *Number of participants* | *Mean age (years)  M (SD)* | *Age range (Years)*  *[min; max]* |
| Male 15-17, team sport | 105 | 32 | 15.7 (0.99) | [15;17] |
| Male 15-17, individual sport | 33 | 32 | 16.4 (0.67) | [15;17] |
| Male 18-20, team sport | 138 | 32 | 19.0 (0.74) | [18;20] |
| Male 18-20, individual sport | 60 | 32 | 19.3 (0.79) | [18;20] |
| Male 21-29, team sport | 92 | 32 | 23.0 (2.27) | [21;29] |
| Male 21-29, individual sport | 64 | 32 | 23.0 (1.84) | [21;28] |
| Male 30-45, team sport | 21 | 21 | 37.3 (4.59) | [30;44] |
| Male 30-45, individual sport | 22 | 21 | 37.2 (5.12) | [30;44] |
| Total male, team sport | 356 | 117 | 22.5 (7.82) | [15;44] |
| Total male, individual Sport | 179 | 117 | 22.8 (7.61) | [15;44] |
| **Total male** | **535** | **234** | **22.6 (7.70)** | **[15;44]** |
| Female 15-17, team sport | 32 | 32 | 15.7 (1.30) | [15;17] |
| Female 15-17, individual sport | 37 | 32 | 16.4 (0.71) | [15;17] |
| Female 18-20, team sport | 50 | 32 | 19.2 (0.72) | [18;20] |
| Female 18-20, individual sport | 84 | 32 | 19.2 (0.71) | [18;20] |
| Female 21-29, team sport | 47 | 32 | 22.3 (1.59) | [21;28] |
| Female 21-29, individual sport | 119 | 32 | 23.1 (2.03) | [21;29] |
| Female 30-45, team sport | 5 | 5 | 36.6 (6.50) | [30;43] |
| Female 30-45, individual sport | 16 | 5 | 36.4 (5.08) | [30;43] |
| Total female, team sport | 134 | 101 | 19.9 (4.96) | [15;43] |
| Total female, individual sport | 256 | 101 | 20.4 (4.82) | [15;43] |
| **Total female** | **390** | **202** | **20.2 (4.89)** | **[15;43]** |
| **Total** | **925** | **436** | **21.5 (6.66)** | **[15;44]** |

**Table S2.** Participant distributes in the normative sample by age group and gender

| **Performance level** | **Gender** | **Count** | **% of total normative sample** |
| --- | --- | --- | --- |
| Adolescents/Young adults (15–20 years) (*n*=256) | Male | 128 | 29.4% |
| Female | 128 | 29.4% |
| Adults (21–45 years) (*n*=180) | Male | 106 | 24.3% |
| Female | 74 | 17.0% |

**Table S3.** Participant distribution in the analysis sample by sport type, performance level and gender

| **Sport type** | **Performance level** | **Gender** | **Counts** | | **% of total** |
| --- | --- | --- | --- | --- | --- |
| Team  (*n*=391) | Non-elite (*n*=184) | Male | | 136 | 18.1% |
| Female | | 48 | 6.4% |
| Pre-elite (*n*=199) | Male | | 147 | 19.5% |
| Female | | 52 | 6.9% |
| Elite (*n*=8) | Male | | 6 | 0.8% |
| Female | | **2** | 0.4% |
| Individual  (*n*=361) | Non-elite (*n*=163) | Male | | 58 | 7.7% |
| Female | | 105 | 13.9% |
| Pre-elite (*n*=172) | Male | | 81 | 10.8% |
| Female | | 91 | 12.1% |
| Elite (*n*=26) | Male | | 9 | 1.2% |
| Female | | 17 | 2.3% |

**Table S4.** Goodness-of-fit indices of HCFA models

| **Model** | **Sample** | **N** | **χ2 (df)** | **p** | **CFI** | **TLI** | **RMSEA [90% CI]** | **SRMR** |
| --- | --- | --- | --- | --- | --- | --- | --- | --- |
| *Initial HCFA Model* | Normative sample | 436 | 7484 (4424) | <0.001 | 0.728 | 0.719 | 0.040  [0.038; 0.041] | 0.087 |
| *Modified Model 1* | Normative sample | 436 | 6582 (3695) | <0.001 | 0.748 | 0.739 | 0.042  [0.041; 0.044] | 0.087 |
| *Modified Model 2* | Normative sample | 436 | 6474 (3609) | <0.001 | 0.750 | 0.741 | 0.043  [0.041; 0.044] | 0.087 |
| *Modified Model 3* | Normative sample | 436 | 4979 (2738) | <0.001 | 0.799 | 0.791 | 0.043  [0.041; 0.045] | 0.084 |
| *Modified Model 4* | Normative sample | 436 | 4540 (2642) | <0.001 | 0.830 | 0.822 | 0.041  [0.039; 0.043] | 0.077 |
| *Modified Model 4* | Male  athletes | 234 | 3700 (2642) | <0.001 | 0.783 | 0.772 | 0.041  [0.038; 0.045] | 0.093 |
| *Modified Model 4* | Female athletes | 202 | 3373 (2642) | <0.001 | 0.832 | 0.824 | 0.037  [0.033; 0.041] | 0.091 |
| *Note*. Estimator is DWLS. Model test is scaled and shifted. Information matrix is expected. Standard errors are robust. Fit indices are based on the scaled test statistics. χ²/df: Degrees of freedom; CFI: Confirmatory Fit Index; TLI: Tucker-Lewis Index; RMSEA: Root Mean Square; SRMR: Standardized Root Mean Square Residual | | | | | | | | |

**Table S5.** Mean differences and effect sizes between gender groups in the LPI-v3s normative sample.

| **LPI-v3 Scale (Short Form)** | **Mean (*SD*) normative sample**  **(*n*=436)** | **Mean (*SD*) male (*n*=234)** | **Mean (*SD*) female (*n*=202)** | **Test statistic (*U*)** | ***p*-value** | **Effect**  **size**  ***r*** | **Norms required** |
| --- | --- | --- | --- | --- | --- | --- | --- |
| N1: Anxious-Insecurity | 26.3 (7.3) | 24.5 (6.6) | 28.3 (7.4) | 16719 | <0.001 | 0.29 | Yes |
| N2: Irritability | 27.9 (9.7) | 26.0 (9.3) | 30.0 (9.7) | 18213 | <0.001 | 0.23 | Yes |
| E1: Sociability | 30.0 (9.1) | 29.6 (9,0) | 30.4 (9.3) | 22899 | 0.573 | 0.03 | No |
| E2: Cheerfulness | 37.8 (7.6) | 38.1 (7.5) | 37.6 (7.8) | 22743 | 0.493 | -0.04 | No |
| E3: Sensation-Seeking | 34.6 (8.5) | 34.9 (8.1) | 28.9 (7.2) | 22930 | 0.590 | -0.03 | No |
| C1: Orderliness | 33.9 (8.3) | 33.8 (8.4) | 34.3 (8.3) | 23402 | 0.859 | 0.01 | No |
| C2: Self-discipline | 32.2 (8.5) | 31.6 (4.9) | 31.0 (9.2) | 19941 | 0.005 | -0.16 | No |
| C4: Prudence | 32.1 (8.0) | 33.2 (7.6) | 31.8 (7.6) | 22487 | 0.378 | -0.05 | No |
| A2: Peacefulness | 32.8 (8.4) | 32.6 (8.4) | 33.0 (8.4) | 23120 | 0.694 | 0.02 | No |
| A3: Compliance | 32.8 (5.7) | 32.5 (6.1) | 33.1 (5.1) | 22668 | 0.453 | 0.04 | No |
| A4: Self-Control | 32.1 (9.7) | 34.0 (9.3) | 30.0 (9.7) | 18213 | <0.001 | -0.23 | Yes |
| O1: Aesthetic Interests | 24.9 (9.4) | 23.2 (8.7) | 26.8 (9.8) | 18533 | <0.001 | 0.22 | Yes |
| O3: Curiosity | 32.2 (7.8) | 32.6 (7.7) | 31.7 (7.9) | 22603 | 0.430 | -0.04 | No |
| O4: Creativity | 32.5 (8.0) | 32.8 (7.1) | 32.2 (8.9) | 22882 | 0.564 | -0.03 | No |
| H2: Humility | 30.8 (8.7) | 30.1 (9.0) | 31.6 (8.3) | 21168 | 0.058 | 0.10 | No |
| N: Neuroticism | 26.8 (6.8) | 25.0 (6.3) | 28.8 (6.8) | 15957 | <0.001 | 0.32 | Yes |
| E: Extraversion | 33.9 (6.9) | 33.8 (6.7) | 34.0 (7.1) | 23461 | 0.895 | 0.01 | No |
| C: Conscientiousness | 32.9 (6.4) | 33.2 (6.5) | 32.5(6.2) | 21972 | 0.205 | -0.07 | No |
| A: Agreeableness | 32.4 (6.5) | 32.9 (6.4) | 31.9(6.6) | 21820 | 0.166 | -0.08 | No |
| O: Openness to Experience | 30.1 (6.1) | 29.8 (5.4) | 30.4(6.7) | 22394 | 0.344 | 0.05 | No |
| M: Lie Scale | 25.1 (7.2) | 25.0 (6.9) | 25.1(7.5) | 23470 | 0.900 | 0.01 | No |

**Table S6**. Pearson correlations between LPI-v3s scales and age in the normative sample

| **LPI-v3s scale** | **Pearson correlation with age** | | |
| --- | --- | --- | --- |
| *Total normative sample (n=436)* | *Female normative subsample (n=202)* | *Male normative subsample (n=234)* |
| N1: Anxious-Insecurity | -0.12* | -0.18** | -0.01 |
| N2: Irritability | -0.03 | -0.08 | 0.07 |
| E1: Sociability | 0.04 | 0.00 | 0.09 |
| E2: Cheerfulness | -0.01 | -0.01 | -0.02 |
| E3: Sensation-Seeking | -0.14** | -0.19** | -0.12 |
| C1: Orderliness | 0.10* | 0.19** | 0.07 |
| C2: Self-discipline | 0.11* | 0.10 | 0.08 |
| C4: Prudence | 0.20*** | 0.14* | 0.22*** |
| A2: Peacefulness | -0.06 | 0.00 | -0.09 |
| A3: Compliance | -0.13** | -0.01 | -0.18** |
| A4: Self-Control | 0.03 | 0.08 | -0.07 |
| O1: Aesthetic Interests | -0.04 | -0.07 | 0.04 |
| O3: Curiosity | 0.20*** | 0.04 | 0.28*** |
| O4: Creativity | 0.07 | -0.01 | 0.11 |
| H2: Humility | 0.18*** | 0.02 | 0.31*** |
| N: Neuroticism | -0.10* | -0.18* | 0.02 |
| E: Extraversion | 0.03 | 0.00 | 0.05 |
| C: Conscientiousness | 0.17*** | 0.20** | 0.15* |
| A: Agreeableness | -0.08 | 0.02 | -0.17** |
| O: Openness to Experience | 0.11* | -0.02 | 0.23*** |
| M: Lie Scale | -0.01 | 0.02 | -0.02 |

*Note*. * *p* <0.05, ** *p* <0.01, *** *p* <0.001.

**Table S7.** Mean differences and effect sizes between age groups in the female subsample (adolescents/young adults [A/YA, 15–20] vs. adults [21–45])

| **LPI-v3 Scale (short form)** | **Mean (*SD*) A/YA (*n*=128)** | **Mean (*SD*) adults (*n*=74)** | **Test**  **used** | **Test statistic** | ***p*-value** | **Effect size**  **d / r** | **Norms required** |
| --- | --- | --- | --- | --- | --- | --- | --- |
| N: Neuroticism | 30.0 (6.42) | 26.8 (6.84) | T-test | t (200) = 3.35 | <0.001 | 0.49 | Yes |
| N1: Anxious-Insecurity | 29.4 (7.43) | 26.4 (7.11) | T-test | t (200) = 2.79 | 0.006 | 0.41 | Yes |
| C: Conscientiousness | 31.5 (5.67) | 34.1 (6.75) | T-test | t (200) = -2.97 | <0.001 | -0.43 | Yes |
| C1: Orderliness | 33.0 (7.89) | 35.9 (8.62) | Mann-Whitney U | U = 3775 | 0.013 | *r*=0.20 | Yes |
| C4: Prudence | 31.0 (7.08) | 33.3 (8.34) | T-test | t (200) = -2.11 | 0.037 | -0.31 | Yes |
| E3: Sensation-Seeking | 34.8 (8.77) | 33.4 (9.14) | Mann-Whitney U | U=4348 | 0.033 | *r*=-0.08 | No |
| *Note*. Hₐ μ15-20 years ≠ μ21-45 years. Cohen's (Effect size for -tests) and Rank Biserial Correlation (*r*) (Effect size for Mann-Whitney tests) are reported. Norms Required indicates scales that met both the correlation criterion (*p* <.05 with age) and the effect size criterion (*d* or *r* ≥ 0.20). | | | | | | | |

**Table S8.** Mean differences and effect sizes between age groups in male subsample (adolescents/young adults [A/YA, 15–20] vs. Adults [21–45])

| **LPI-v3 Scale**  **(short form)** | **Mean (SD) A/YA (*n*=128)** | **Mean**  **(SD)**  **adults (*n*=106)** | **Test used** | **Test statistic** | ***p*-value** | **Effect Size**  **d / r** | **Norms required** |
| --- | --- | --- | --- | --- | --- | --- | --- |
| C: Conscientiousness | 32.2 (6.58) | 34.4 (6.24) | T-test | t (232) = -2.60 | 0.010 | -0.34 | Yes |
| C4: Prudence | 30.8 (7.88) | 34.4 (8.41) | Mann-Whitney U | U = 5167 | <0.001 | *r*=0.24 | Yes |
| A: Agreeableness | 33.5 (6.10) | 32.1 (6.71) | T-test | t (232) = 1.64 | 0.103 | 0.21 | No |
| A3: Compliance | 33.6 (7.27) | 29.8 (8.43) | Mann-Whitney U | U = 4920 | <0.001 | *r*=-0.27 | Yes |
| O: Openness to Experience | 29.1 (5.19) | 30.6 (5.64) | T-test | t (232) = -2.14 | 0.034 | -0.28 | Yes |
| O3: Curiosity | 31.4 (7.91) | 34.0 (9.45) | Mann-Whitney U | U = 4645 | 0.014 | *r*=0.19 | No |
| H2: Humility | 27.9 (8.77) | 32.7 (9.14) | Mann-Whitney U | U = 4348 | <0.001 | *r*=0.32 | Yes |
| *Note*. Hₐ μ15-20 years ≠ μ21-45 years. Cohen's (Effect size for -tests) and Rank Biserial Correlation (*r*) (Effect size for Mann-Whitney tests) are reported. Norms Required indicates scales that met both the correlation criterion (*p* <.05 with age) and the effect size criterion (*d* or *r* ≥ 0.20). | | | | | | | |
